# Supplementary material for: Bisimidazolium Salt Glycosyltransferase Inhibitors Suppress Hepatocellular Carcinoma Progression In Vitro and In Vivo
Source: MDPI journal article supplement (doi:10.3390/ph15060716), 2022-06-05
Supplement: s1 [file s1]

## Supplementary information

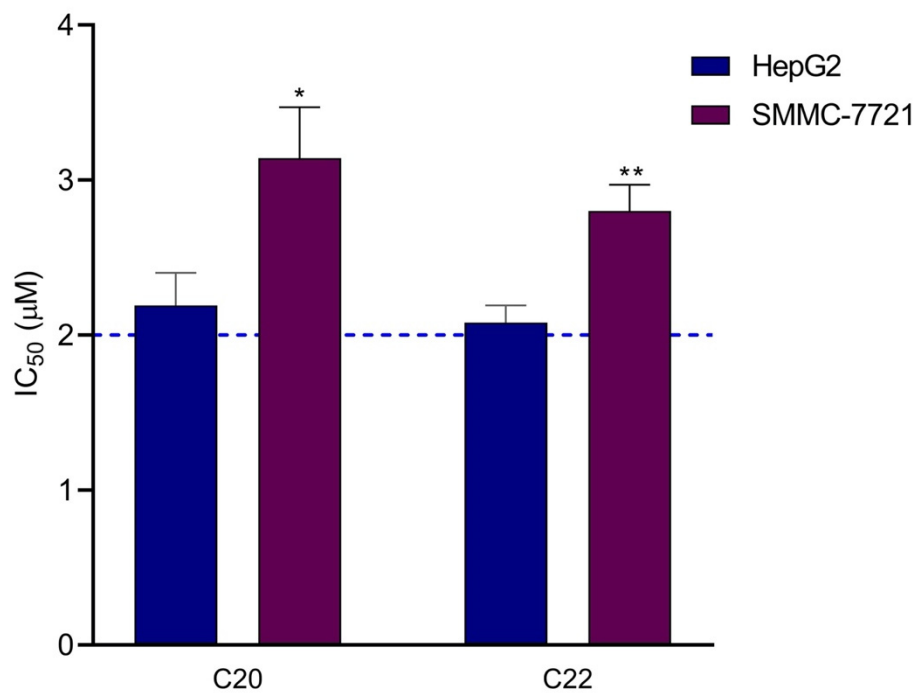

**Figure S1** IC<sub>50</sub> of C20 and C22 for HepG2 and SMMC-7721 cells. The displayed data correspond to the mean  $\pm$  SD of three separate experiments. The  $p$ -value was analyzed by Student  $t$ -test using GraphPad Prism version 8.00. \*  $p < 0.05$ , \*\*  $p < 0.01$ , HepG2 *vs.* SMMC-7721 groups.

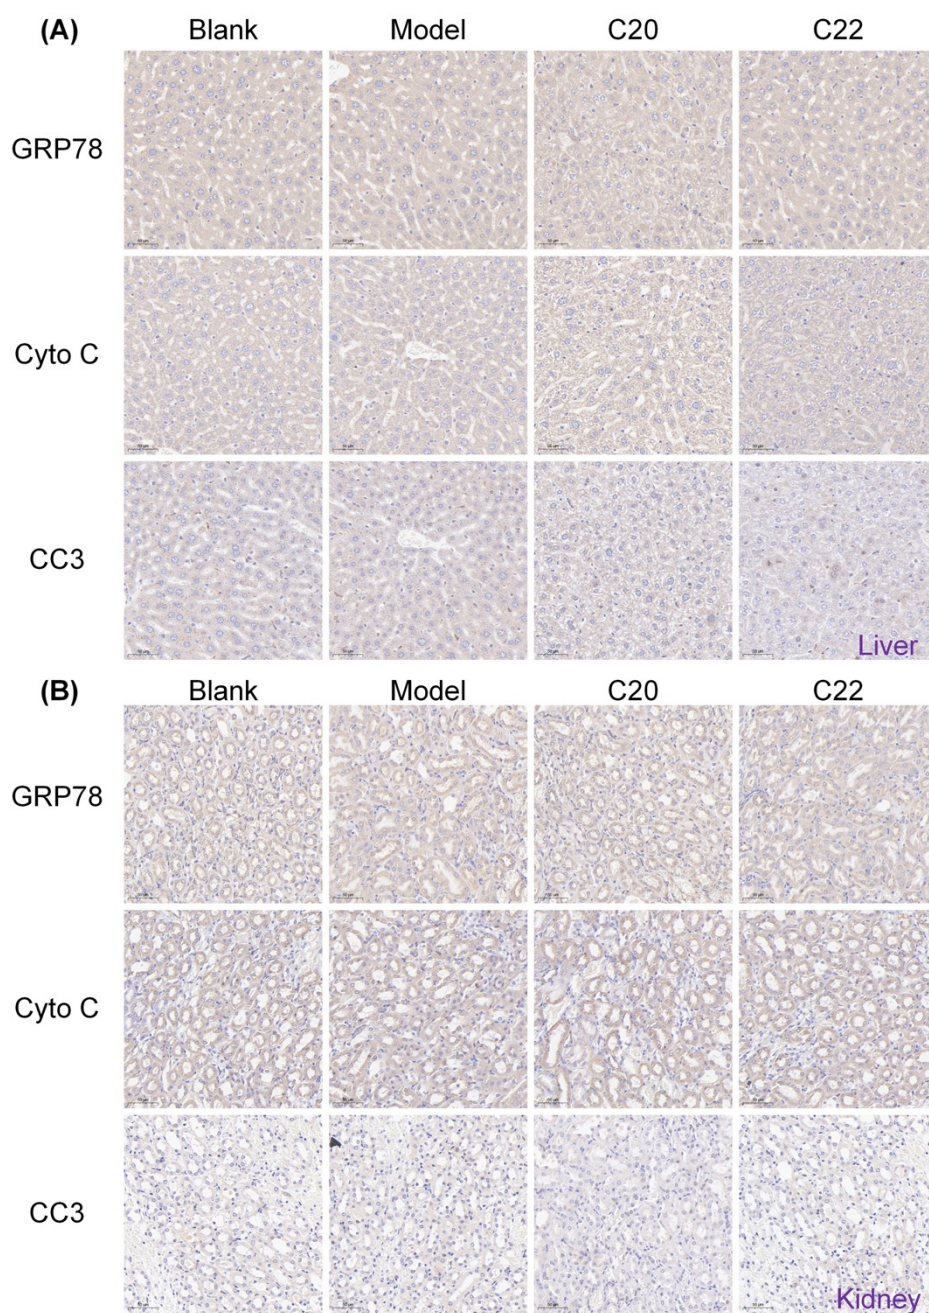

**Figure S2** Immunohistochemistry stain of (A) liver and (B) kidney tissues harvested from the xenograft mice.
